# Supplementary material for: Hsp90 shapes protein and RNA evolution to balance trade-offs between protein stability and aggregation
Source: PubMed Central journal article supplement (PMC5934419; doi:10.1038/s41467-018-04203-x), 2018-05-03
Supplement: 41467_2018_4203_MOESM1_ESM.pdf [file 41467_2018_4203_MOESM1_ESM.pdf]

Supplementary Information for

**Hsp90 shapes protein and RNA evolution to balance trade-offs  
between protein stability and aggregation**

**Geller, Pechmann et al**

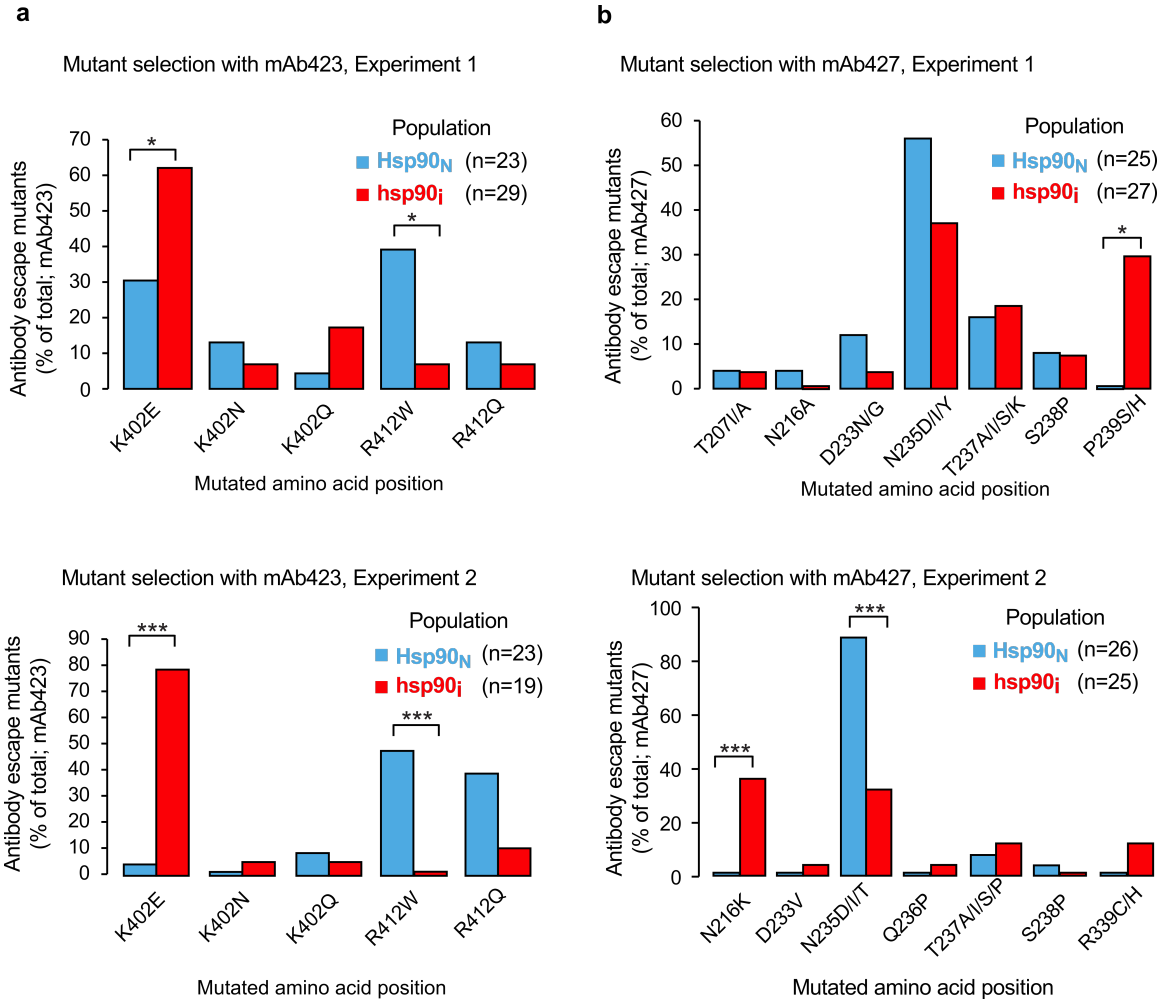

**Supplementary Figure 1: Results of individual mutant capsid selection assays.**

(a,b) Abundance and distribution of mAb423 (a) or mAb427 (b) escape variants in populations of Sabin 1 (a) or wild-type (b) poliovirus from *Hsp90<sub>N</sub>* and *hsp90<sub>i</sub>* populations from 2 separate experiments. The number of mAb-resistant virus variants examined (n) is indicated. Significance: \*  $p < 0.05$ , \*\*  $p < 0.01$ , \*\*\*  $p < 0.005$  by two-tail Fisher's exact test.

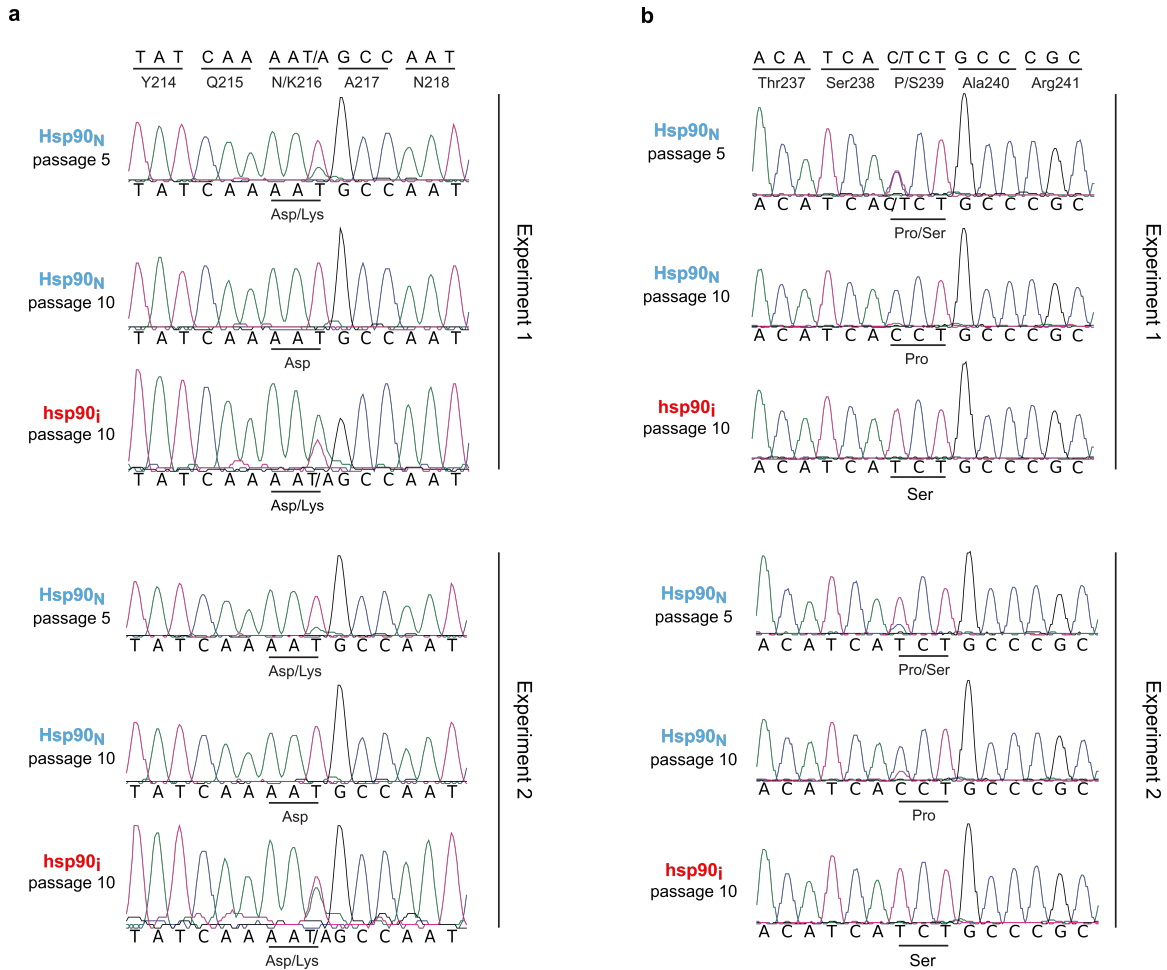

**Supplementary Figure 2: Sanger sequencing analysis of competition experiments showing effect of Hsp90 activity on the fitness of escape variants.**

(a,b) Results of competition experiments testing the fitness of N216K (a) or P239S (b) variants under conditions of normal or low Hsp90 activity. An initial infection was performed with a 1:5 ratio of wild-type (N216 or P239) to *hsp90<sub>i</sub>* variant (K216 or S239) virus. Viruses were then passaged for a total of 10 passages and competition results assessed by Sanger sequencing the passage 10 virus populations. Intermediate passage 5 results for normal Hsp90 conditions showing mixed population are also shown.

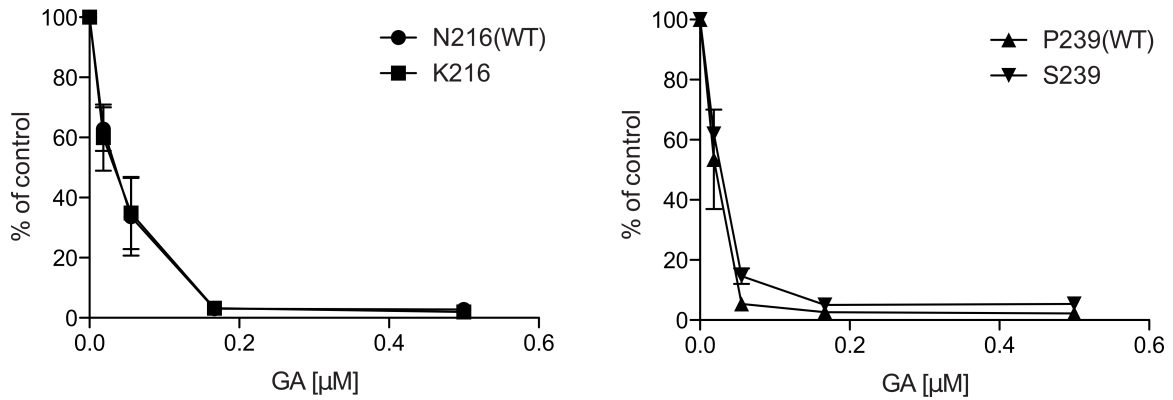

**Supplementary Figure 3: mAb escape variants from *hsp90i* populations do not show reduced sensitivity to Hsp90 inhibition.** (a) Per cent of virus production relative to no Hsp90 inhibitor (Geldanamycin, GA) for both wild-type and *hsp90i* variants K216 and S239 observed to be enriched in mAb selection experiments. Results represent data from 3 experiments, with mean and SEM plotted. No significant differences were observed ( $p > 0.1$  by MWW test).

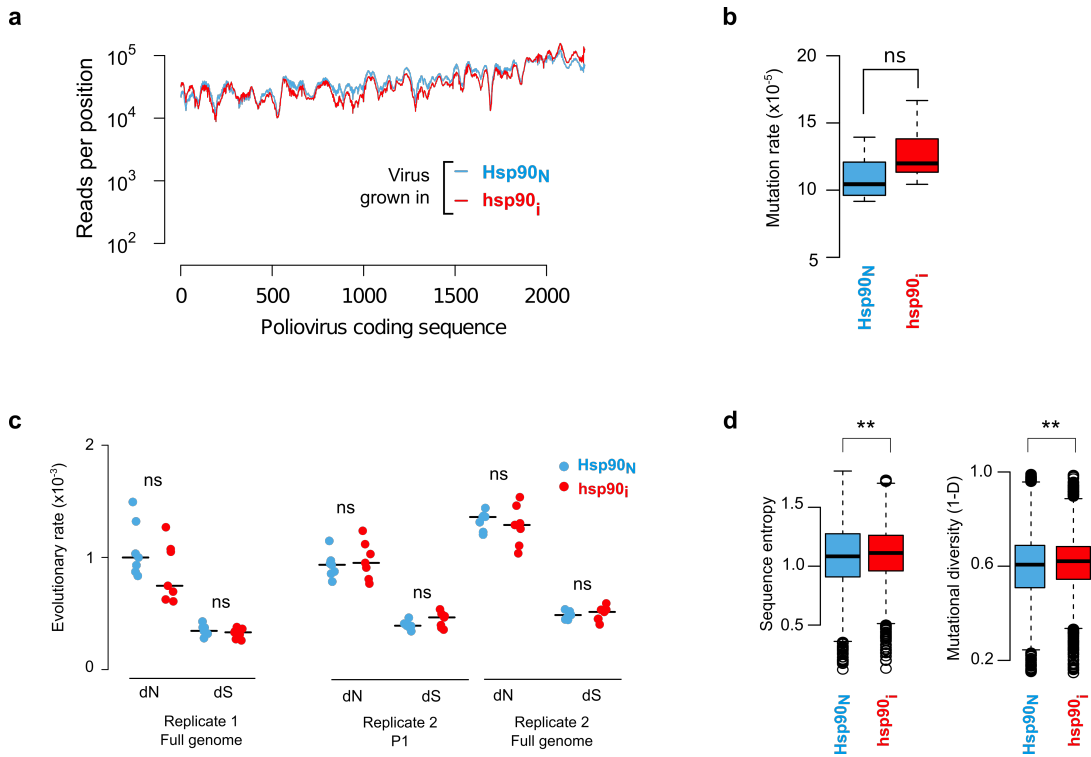

#### Supplementary Figure 4: Reproducibility of CirSeq analysis

(a) CirSeq sequencing coverage of the poliovirus coding region for Replica 2. (b) Mutation rate of virus populations in Replica 2. No significance difference is observed for viral passages between  $Hsp90_N$  and  $hsp90_i$  conditions. (c) Evolutionary rates  $dN$  and  $dS$  of poliovirus populations. (d) Mutational diversity of poliovirus populations for Replica 2. Viral populations passaged under reduced Hsp90 activity ( $hsp90_i$ ) show higher diversity of mutations as estimated by sequence entropy or mutational diversity (1- $D$ ), with  $D$  as Simpson's diversity index. For boxplots, the centre line represents the median, the bound box the interquartile range, and the whiskers 1.5x the interquartile range. Significance: ns  $p > 0.05$  (not significant), \*\*  $p < 0.01$  by MWW test.

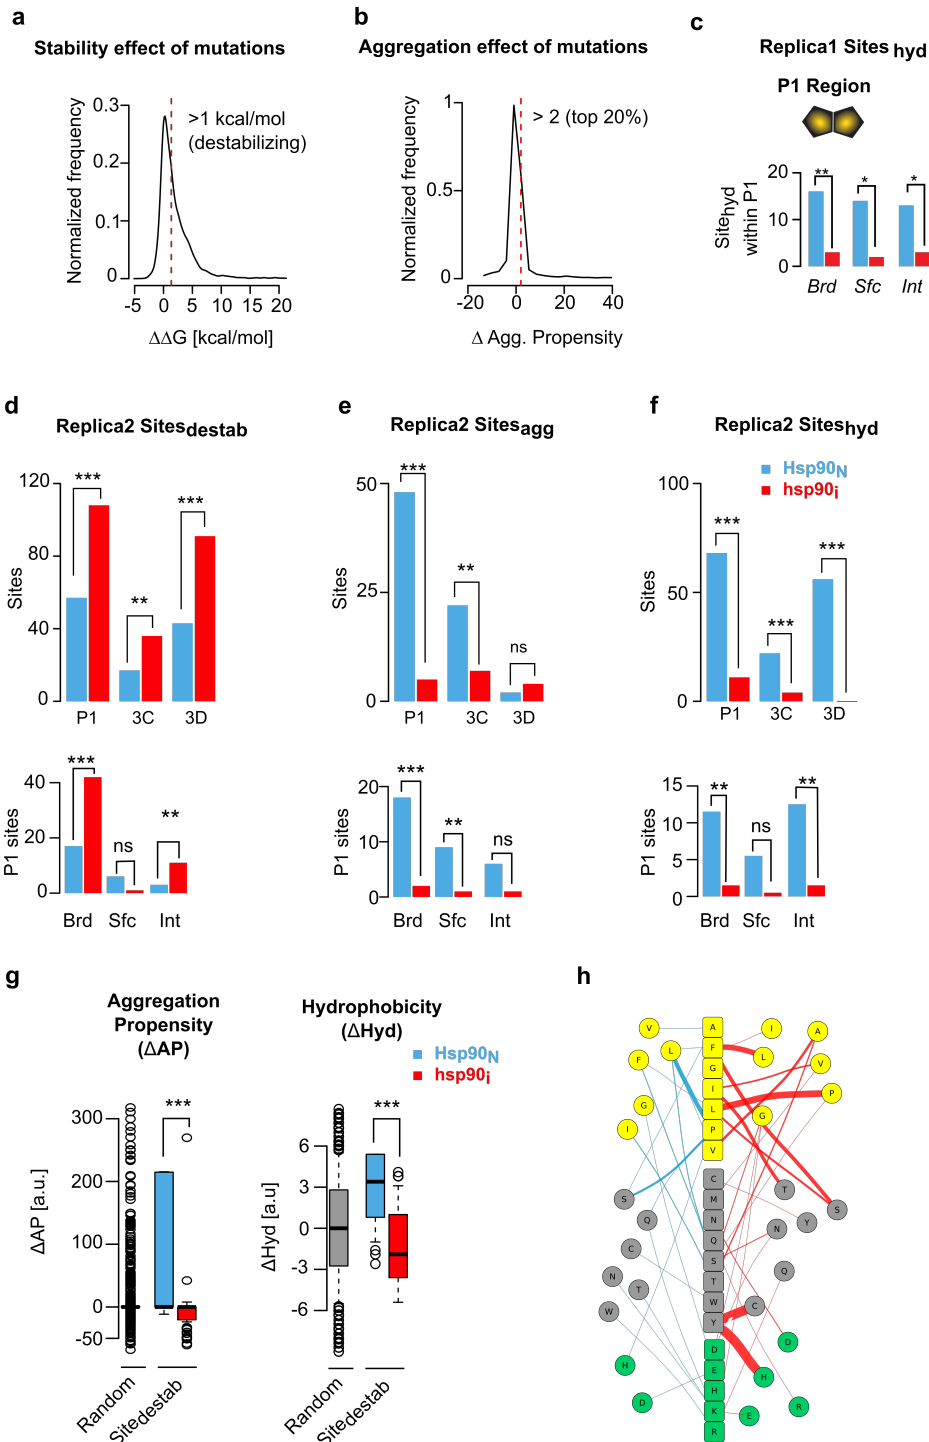

**Supplementary Figure 5: Distribution of stability and aggregation effects of variants and reproducibility of variants analyses for replica 2.**

(a) Distribution of the stability effect of all possible amino acid mutations in poliovirus proteins P1 (capsid), 3C (protease) and 3D (polymerase). Mutations were calculated using the FoldX algorithm and those having a DDG > 1kcal/mol are considered

destabilizing. **(b)** Distribution of the effect of all possible amino acid mutations in poliovirus proteins P1 (capsid), 3C (protease), and 3D (polymerase) on the aggregation propensity predicted with the TANGO algorithm. We classified the top 20%, i.e. mutations that increase the aggregation propensity by more than 2 [a.u.], as aggregation prone mutations. **(c)** The distribution of Site<sub>hyd</sub> at buried (Brd), interface (Int), or surface (Sfc) positions across P1 based on the capsid crystal structure (PDB: 2PLV) for Replica 1. **(d)** Sites that differ in their ability to accommodate destabilizing variants between *Hsp90<sub>N</sub>* and *hsp90<sub>i</sub>* conditions (Sites<sub>destab</sub>) for Replica 2. All analysed viral proteins accommodate more Sites<sub>destab</sub> at reduced Hsp90 activity. Within P1, Sites<sub>destab</sub> differ significantly in buried (Brd) and interface (Int) position, whereas no significant differences were observed for the capsid surface (Srf). **(e)** Sites that differ in their ability to accommodate aggregation prone mutations between *Hsp90<sub>N</sub>* and *hsp90<sub>i</sub>* conditions (Sites<sub>agg</sub>) for Replica 2. P1 and 3C accommodate significantly fewer Sites<sub>destab</sub> at lower Hsp90 activity. Within P1, Sites<sub>agg</sub> differ significantly at buried and surface positions. **(f)** Sites that differ in their ability to accommodate hydrophobic mutations between *Hsp90<sub>N</sub>* and *hsp90<sub>i</sub>* conditions (Sites<sub>hyd</sub>) for Replica 2. All analysed viral proteins accommodate significantly fewer Sites<sub>hyd</sub> at lower Hsp90 activity. Within P1, Sites<sub>hyd</sub> differ significantly at buried and interface positions across the P1 protein. **(g)** Mutational pleiotropy in Replica 2. Destabilizing mutations enriched in *Hsp90<sub>N</sub>* are significantly more aggregation prone and hydrophobic compared to destabilizing mutations enriched in *hsp90<sub>i</sub>*. **(h)** Destabilizing variants observed in Site<sub>destab</sub> in *Hsp90<sub>N</sub>* and *hsp90<sub>i</sub>* populations of replica 2. The edge weight scales with the number of occurrences of variants enriched in *Hsp90<sub>N</sub>* (left) and *hsp90<sub>i</sub>* (right), respectively, and the wild-type amino acid is indicated in the middle. For boxplots, the centre line represents the median, the bound box the interquartile range, and the whiskers 1.5x the interquartile range. Significance: ns  $p > 0.05$  (not significant), \*\*  $p < 0.01$ , \*\*\*  $p < 0.001$ .

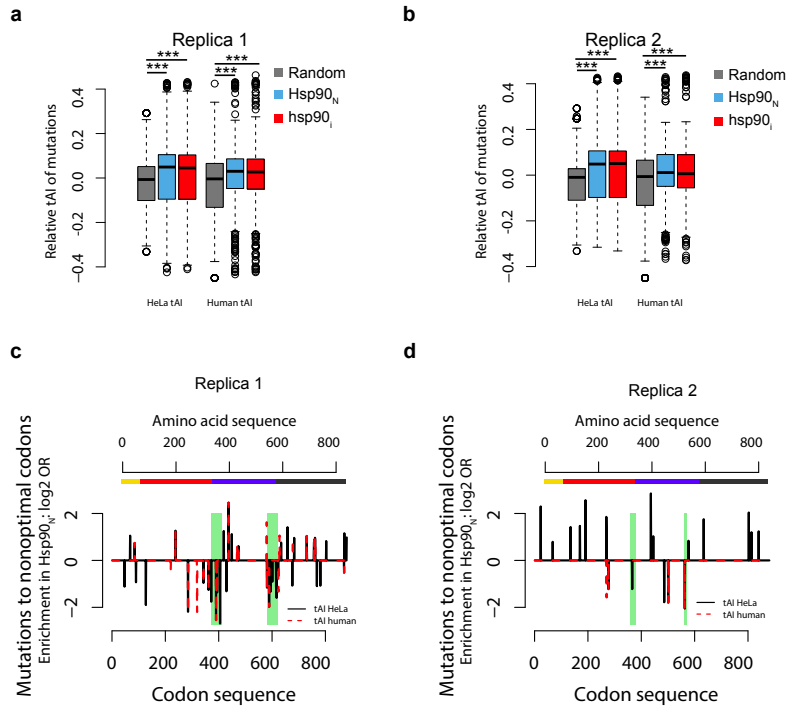

**Supplementary Figure 6: Analysis of codon optimality for *Hsp90<sub>N</sub>* and *hsp90<sub>i</sub>* populations.**

**(a,b)** Change in relative tRNA adaptation index (tAI) of sequence mutations based on either human or HeLa cell tAI for both replica 1 (a) or 2 (b). Under all conditions, codons are in general significantly optimized compared to random mutations. **(c,d)** Sites showing significant codon deoptimization differences between *Hsp90<sub>N</sub>* and *hsp90<sub>i</sub>* populations in replica 1 (c) or replica (2). For boxplots, the centre line represents the median, the bound box the interquartile range, and the whiskers 1.5x the interquartile range. Significance: \*\*\* p < 0.001 by MWW test.



**Supplementary Table 1:** Escape mutants selected with mAb423.  
Summary of mAb423 escape mutants from experiments 1 and 2.

Experiment 1

| Virus Population         | Clone | Position | Nucleotide |     | Amino Acid |     | Amino Acid # |
|--------------------------|-------|----------|------------|-----|------------|-----|--------------|
|                          |       |          | Original   | New | Original   | New |              |
| <i>Hsp90<sub>N</sub></i> | 1     | 1943     | A          | G   | K          | E   | 402          |
|                          | 2     | 1943     | A          | G   | K          | E   | 402          |
|                          | 3     | 1943     | A          | G   | K          | E   | 402          |
|                          | 4     | 1943     | A          | G   | K          | E   | 402          |
|                          | 5     | 1943     | A          | C   | K          | Q   | 402          |
|                          | 6     | 1943     | A          | G   | K          | E   | 402          |
|                          | 7     | 1943     | A          | G   | K          | E   | 402          |
|                          | 8     | 1943     | A          | G   | K          | E   | 402          |
|                          | 9     | 1945     | A          | C   | K          | N   | 402          |
|                          | 10    | 1945     | A          | T   | K          | N   | 402          |
|                          | 11    | 1945     | A          | T   | K          | N   | 402          |
|                          | 12    | 1976     | C          | T   | R          | W   | 412          |
|                          | 13    | 1976     | C          | T   | R          | W   | 412          |
|                          | 14    | 1976     | C          | T   | R          | W   | 412          |
|                          | 15    | 1976     | C          | T   | R          | W   | 412          |
|                          | 16    | 1976     | C          | T   | R          | W   | 412          |
|                          | 17    | 1976     | C          | T   | R          | W   | 412          |
|                          | 18    | 1976     | C          | T   | R          | W   | 412          |
|                          | 19    | 1976     | C          | T   | R          | W   | 412          |
|                          | 20    | 1976     | C          | T   | R          | W   | 412          |
|                          | 21    | 1977     | G          | A   | R          | Q   | 412          |

|                          |      |      |   |   |   |     |     |
|--------------------------|------|------|---|---|---|-----|-----|
|                          | 22   | 1977 | G | A | R | Q   | 412 |
|                          | 23   | 1977 | G | A | R | Q   | 412 |
| <i>hsp90<sub>i</sub></i> | 1    | 1943 | A | G | K | E   | 402 |
|                          | 2    | 1943 | A | G | K | E   | 402 |
|                          | 3    | 1943 | A | G | K | E   | 402 |
|                          | 4    | 1943 | A | G | K | E   | 402 |
|                          | 5    | 1943 | A | C | K | Q   | 402 |
|                          | 6    | 1943 | A | G | K | E   | 402 |
|                          | 7    | 1943 | A | G | K | E   | 402 |
|                          | 8    | 1943 | A | G | K | E   | 402 |
|                          | 9    | 1943 | A | C | K | E   | 402 |
|                          | 10   | 1943 | A | G | K | E   | 402 |
|                          | 11   | 1943 | A | C | K | Q   | 402 |
|                          | 12   | 1943 | A | G | K | E   | 402 |
|                          | 13   | 1943 | A | g | K | E   | 402 |
|                          | 14   | 1943 | A | G | K | E   | 402 |
|                          | 15   | 1943 | A | G | K | E   | 402 |
|                          | 16   | 1943 | A | G | K | E   | 402 |
|                          | 17   | 1943 | A | G | K | E   | 402 |
|                          | 18   | 1943 | A | C | K | Q   | 402 |
|                          | 19   | 1943 | A | C | K | Q   | 402 |
|                          | 20   | 1943 | A | G | K | E   | 402 |
|                          | 21   | 1943 | A | G | K | E   | 402 |
|                          | 22   | 1943 | A | G | K | E   | 402 |
|                          | 23   | 1943 | A | C | K | Q   | 402 |
|                          | 24   | 1945 | A | T | K | N   | 402 |
|                          | 25   | 1945 | A | T | K | N   | 402 |
| 26                       | 1976 | C    | T | R | W | 412 |     |
| 27                       | 1976 | C    | T | R | W | 412 |     |

|    |      |   |   |   |   |     |
|----|------|---|---|---|---|-----|
| 28 | 1977 | G | A | R | Q | 412 |
| 29 | 1977 | G | A | R | Q | 412 |

## Experiment 2

| Virus Population | Clone # | Position | Nucleotide |     | Amino Acid |     | Amino Acid # |
|------------------|---------|----------|------------|-----|------------|-----|--------------|
|                  |         |          | Original   | New | Original   | New |              |
| <i>Hsp90N</i>    | 1       | 1943     | A          | C   | K          | Q   | 402          |
|                  | 2       | 1943     | A          | C   | K          | Q   | 402          |
|                  | 3       | 1943     | A          | G   | K          | E   | 402          |
|                  | 4       | 1976     | C          | T   | R          | W   | 412          |
|                  | 5       | 1976     | C          | T   | R          | W   | 412          |
|                  | 6       | 1976     | C          | T   | R          | W   | 412          |
|                  | 7       | 1976     | C          | T   | R          | W   | 412          |
|                  | 8       | 1976     | C          | T   | R          | W   | 412          |
|                  | 9       | 1976     | C          | T   | R          | W   | 412          |
|                  | 10      | 1976     | C          | T   | R          | W   | 412          |
|                  | 11      | 1976     | C          | T   | R          | W   | 412          |
|                  | 12      | 1976     | C          | T   | R          | W   | 412          |
|                  | 13      | 1976     | C          | T   | R          | W   | 412          |
|                  | 14      | 1976     | C          | T   | R          | W   | 412          |
|                  | 15      | 1977     | G          | A   | R          | Q   | 412          |
|                  | 16      | 1977     | G          | A   | R          | Q   | 412          |
|                  | 17      | 1977     | G          | A   | R          | Q   | 412          |
|                  | 18      | 1977     | G          | A   | R          | Q   | 412          |
|                  | 19      | 1977     | G          | A   | R          | Q   | 412          |
|                  | 20      | 1977     | G          | A   | R          | Q   | 412          |

|               |    |      |   |   |   |   |     |
|---------------|----|------|---|---|---|---|-----|
|               | 21 | 1977 | G | A | R | Q | 412 |
|               | 22 | 1977 | G | A | R | Q | 412 |
|               | 23 | 1977 | G | A | R | Q | 412 |
| <i>hsp90i</i> | 1  | 1943 | A | G | K | E | 402 |
|               | 2  | 1943 | A | G | K | E | 402 |
|               | 3  | 1943 | A | G | K | E | 402 |
|               | 4  | 1943 | A | G | K | E | 402 |
|               | 5  | 1943 | A | G | K | E | 402 |
|               | 6  | 1943 | A | G | K | E | 402 |
|               | 7  | 1943 | A | G | K | E | 402 |
|               | 8  | 1943 | A | G | K | E | 402 |
|               | 9  | 1943 | A | G | K | E | 402 |
|               | 10 | 1943 | A | G | K | E | 402 |
|               | 11 | 1943 | A | G | K | E | 402 |
|               | 12 | 1943 | A | G | K | E | 402 |
|               | 13 | 1943 | A | G | K | E | 402 |
|               | 14 | 1943 | A | G | K | E | 402 |
|               | 15 | 1943 | A | G | K | E | 402 |
|               | 16 | 1943 | A | C | K | Q | 402 |
|               | 17 | 1945 | A | T | K | N | 402 |
|               | 18 | 1977 | G | A | R | Q | 412 |
|               | 19 | 1977 | G | A | R | Q | 412 |

**Supplementary Table 2:** Escape mutants selected with mAb427.  
Summary of mAb427 escape mutants for experiments 1 and 2.

Experiment 1

| Virus Population | Clone # | Position | Nucleotide |     | Amino Acid |     | AA Number |
|------------------|---------|----------|------------|-----|------------|-----|-----------|
|                  |         |          | Original   | New | Original   | New |           |
| <i>Hsp90N</i>    | 1       | 1361     | A          | G   | T          | A   | 207       |
|                  | 2       | 1390     | T          | A   | N          | K   | 216       |
|                  | 3       | 1439     | G          | A   | D          | N   | 233       |
|                  | 4       | 1439     | G          | A   | D          | N   | 233       |
|                  | 5       | 1440     | A          | G   | D          | G   | 233       |
|                  | 6       | 1445     | A          | G   | N          | D   | 235       |
|                  | 7       | 1445     | A          | G   | N          | D   | 235       |
|                  | 8       | 1445     | A          | G   | N          | D   | 235       |
|                  | 9       | 1445     | A          | G   | N          | D   | 235       |
|                  | 10      | 1445     | A          | G   | N          | D   | 235       |
|                  | 11      | 1445     | A          | G   | N          | D   | 235       |
|                  | 12      | 1445     | A          | G   | N          | D   | 235       |
|                  | 13      | 1445     | A          | G   | N          | D   | 235       |
|                  | 14      | 1445     | A          | G   | N          | D   | 235       |
|                  | 15      | 1445     | A          | G   | N          | D   | 235       |
|                  | 16      | 1445     | A          | G   | N          | D   | 235       |
|                  | 17      | 1445     | A          | G   | N          | D   | 235       |
|                  | 18      | 1446     | A          | T   | N          | I   | 235       |
|                  | 19      | 1446     | A          | T   | N          | I   | 235       |
|                  | 20      | 1451     | A          | G   | T          | A   | 237       |
|                  | 21      | 1451     | A          | T   | T          | S   | 237       |

|               |    |      |   |   |   |   |     |
|---------------|----|------|---|---|---|---|-----|
|               | 22 | 1451 | A | G | T | A | 237 |
|               | 23 | 1451 | A | G | T | A | 237 |
|               | 24 | 1454 | T | C | S | P | 238 |
|               | 25 | 1454 | T | C | S | P | 238 |
| <i>hsp90i</i> | 1  | 1362 | C | T | T | I | 207 |
|               | 2  | 1440 | A | G | D | G | 233 |
|               | 3  | 1445 | G | A | N | D | 235 |
|               | 4  | 1445 | A | G | N | D | 235 |
|               | 5  | 1445 | A | G | N | D | 235 |
|               | 6  | 1445 | A | G | N | D | 235 |
|               | 7  | 1445 | A | G | N | D | 235 |
|               | 8  | 1445 | A | T | N | Y | 235 |
|               | 9  | 1445 | A | G | N | D | 235 |
|               | 10 | 1445 | A | G | N | D | 235 |
|               | 11 | 1445 | A | G | N | D | 235 |
|               | 12 | 1445 | A | G | N | D | 235 |
|               | 13 | 1451 | A | G | T | A | 237 |
|               | 14 | 1451 | A | G | T | A | 237 |
|               | 15 | 1451 | A | G | T | A | 237 |
|               | 16 | 1452 | C | T | T | I | 237 |
|               | 17 | 1452 | C | A | T | K | 237 |
|               | 18 | 1454 | T | C | S | P | 238 |
|               | 19 | 1454 | T | C | S | P | 238 |
|               | 20 | 1457 | C | T | P | S | 239 |
|               | 21 | 1457 | C | T | P | S | 239 |
|               | 22 | 1457 | C | T | P | S | 239 |
|               | 23 | 1457 | C | A | P | H | 239 |
|               | 24 | 1457 | C | T | P | S | 239 |
|               | 25 | 1457 | C | T | P | S | 239 |

|  |    |      |   |   |   |   |     |
|--|----|------|---|---|---|---|-----|
|  | 26 | 1457 | C | T | P | S | 239 |
|  | 27 | 1458 | C | A | P | H | 239 |

## Experiment 2

| Virus Population | Clone # | Position | Nucleotide |     | Amino Acid |     | AA Number |
|------------------|---------|----------|------------|-----|------------|-----|-----------|
|                  |         |          | Original   | New | Original   | New |           |
| <i>Hsp90N</i>    | 1       | 1445     | A          | G   | N          | D   | 235       |
|                  | 2       | 1445     | A          | G   | N          | D   | 235       |
|                  | 3       | 1445     | A          | G   | N          | D   | 235       |
|                  | 4       | 1445     | A          | G   | N          | D   | 235       |
|                  | 5       | 1445     | A          | G   | N          | D   | 235       |
|                  | 6       | 1445     | A          | G   | N          | D   | 235       |
|                  | 7       | 1445     | A          | G   | N          | D   | 235       |
|                  | 8       | 1445     | A          | G   | N          | D   | 235       |
|                  | 9       | 1445     | A          | G   | N          | D   | 235       |
|                  | 10      | 1446     | A          | C   | N          | T   | 235       |
|                  | 11      | 1446     | A          | C   | N          | T   | 235       |
|                  | 12      | 1446     | A          | C   | N          | T   | 235       |
|                  | 13      | 1446     | A          | C   | N          | T   | 235       |
|                  | 14      | 1446     | A          | C   | N          | T   | 235       |
|                  | 15      | 1446     | A          | C   | N          | T   | 235       |
|                  | 16      | 1446     | A          | C   | N          | T   | 235       |
|                  | 17      | 1446     | A          | C   | N          | T   | 235       |
|                  | 18      | 1446     | A          | C   | N          | T   | 235       |
|                  | 19      | 1446     | A          | C   | N          | T   | 235       |
|                  | 20      | 1446     | A          | C   | N          | T   | 235       |
|                  | 21      | 1446     | A          | C   | N          | T   | 235       |

|               |    |      |   |   |   |   |     |
|---------------|----|------|---|---|---|---|-----|
|               | 22 | 1446 | A | C | N | T | 235 |
|               | 23 | 1446 | A | T | N | I | 235 |
|               | 24 | 1451 | A | G | T | A | 237 |
|               | 25 | 1452 | C | T | I | I | 237 |
|               | 25 | 1454 | T | C | S | P | 238 |
| <i>hsp90i</i> | 1  | 1390 | T | A | N | K | 216 |
|               | 2  | 1390 | T | A | N | K | 216 |
|               | 3  | 1390 | T | A | N | K | 216 |
|               | 4  | 1390 | T | A | N | K | 216 |
|               | 5  | 1390 | T | A | N | K | 216 |
|               | 6  | 1390 | T | A | N | K | 216 |
|               | 7  | 1390 | T | A | N | K | 216 |
|               | 8  | 1390 | T | A | N | K | 216 |
|               | 9  | 1390 | T | A | N | K | 216 |
|               | 10 | 1440 | A | T | D | V | 233 |
|               | 11 | 1445 | A | G | N | D | 235 |
|               | 12 | 1445 | A | G | N | D | 235 |
|               | 13 | 1445 | A | G | N | D | 235 |
|               | 14 | 1445 | A | G | N | D | 235 |
|               | 15 | 1445 | A | G | N | D | 235 |
|               | 16 | 1445 | A | G | N | D | 235 |
|               | 17 | 1445 | A | G | N | D | 235 |
|               | 18 | 1445 | A | G | N | D | 235 |
|               | 19 | 1449 | A | C | Q | P | 236 |
|               | 20 | 1451 | A | C | T | P | 237 |
|               | 21 | 1451 | A | G | T | S | 237 |
|               | 22 | 1451 | A | T | T | S | 237 |
|               | 23 | 1757 | C | T | R | C | 339 |
|               | 24 | 1757 | C | T | R | C | 339 |



|  |    |      |   |   |   |   |     |
|--|----|------|---|---|---|---|-----|
|  | 25 | 1758 | G | A | R | H | 339 |
|--|----|------|---|---|---|---|-----|
